# Supplementary material
Source: publisher figshare collection journal article supplement (https://springernature.figshare.com/articles/dataset/_/21936165)
Supplement: Supplementary file 1 [file 1]

## Sheet: Fig. 2A
LBL			PA			NFX		NF90		NF270				MLR=5	MLR=20	MLR=40	MLR=60	MLR=150
mg conc. (mg/L)	li conc. (mg/L)		mg conc. (mg/L)	li conc. (mg/L)		mg conc. (mg/L)	li conc. (mg/L)	mg conc. (mg/L)	li conc. (mg/L)	mg conc. (mg/L)	li conc. (mg/L)		mg conc. (mg/L)	li conc. (mg/L)	li conc. (mg/L)	li conc. (mg/L)	li conc. (mg/L)	li conc. (mg/L)
469.274	23.4637		9120	152		469.274	23.4637	469.274	23.4637	469.274	23.4637		100	5	2.5	1.66667	0.66667	20
486.604	12.1651		5785	132		486.604	12.1651	486.604	12.1651	486.604	12.1651		200	10	5	3.33333	1.33333	40
492.669	8.21114		15385	242		492.669	8.21114	492.669	8.21114	492.669	8.21114		300	15	7.5	5	2	60
938.547	46.9274		469.274	23.4637		938.547	46.9274	938.547	46.9274	938.547	46.9274		400	20	10	6.66667	2.66667	80
1407.82	70.3911		2820	141		1407.82	70.3911	1407.82	70.3911	1407.82	70.3911		500	25	12.5	8.33333	3.33333	100
463	26.96		2820	141									600	30	15	10	4	120
468	12.64		705	141									700	35	17.5	11.6667	4.66667	140
477	8.56		705	141									800	40	20	13.3333	5.33333	160
892	47.52		1410	141									900	45	22.5	15	6	180
1230	60		1410	141									1000	50	25	16.6667	6.66667	200
1310	66		2115	141									1100	55	27.5	18.3333	7.33333	220
468	23.84		2115	141									1200	60	30	20	8	240
500	13.84		469.274	23.4637									1300	65	32.5	21.6667	8.66667	260
506	9.04		938.547	46.9274									1400	70	35	23.3333	9.33333	280
957	49.75		1407.82	70.3911									1500	75	37.5	25	10	300
1230	60		1877.09	93.8547									1600	80	40	26.6667	10.6667	320
1530	86		480.687	16.0229									1700	85	42.5	28.3333	11.3333	340
			961.373	32.0458									1800	90	45	30	12	360
			1442.06	48.0687									1900	95	47.5	31.6667	12.6667	380
			1922.75	64.0916									2000	100	50	33.3333	13.3333	400
			486.604	12.1651									2100	105	52.5	35	14	420
			973.208	24.3302									2200	110	55	36.6667	14.6667	440
			1459.81	36.4953									2300	115	57.5	38.3333	15.3333	460
			1946.42	48.6604									2400	120	60	40	16	480
			469.274	23.4637									2500	125	62.5	41.6667	16.6667	500
			469.274	23.4637									2600	130	65	43.3333	17.3333	520
			438.07	43.807									2700	135	67.5	45	18	540
			486.604	12.1651									2800	140	70	46.6667	18.6667	560
			938.547	46.9274									2900	145	72.5	48.3333	19.3333	580
			1407.82	70.3911									3000	150	75	50	20	600
			494.865	6.77898									3100	155	77.5	51.6667	20.6667	620
			1484.6	20.3369									3200	160	80	53.3333	21.3333	640
			2474.33	33.8949									3300	165	82.5	55	22	660
			3464.06	47.4528									3400	170	85	56.6667	22.6667	680
			469.274	23.4637									3500	175	87.5	58.3333	23.3333	700
			480.687	16.0229									3600	180	90	60	24	720
			492.669	8.21114									3700	185	92.5	61.6667	24.6667	740
			469.274	23.4637									3800	190	95	63.3333	25.3333	760
			471.471	22.0313									3900	195	97.5	65	26	780
			252.632	16.4706									4000	200	100	66.6667	26.6667	800
			505.263	16.4706									4100	205	102.5	68.3333	27.3333	820
			757.895	16.4706									4200	210	105	70	28	840
			1010.53	16.4706									4300	215	107.5	71.6667	28.6667	860
			2400	100									4400	220	110	73.3333	29.3333	880
			471.471	22.0313									4500	225	112.5	75	30	900
			469.274	23.4637									4600	230	115	76.6667	30.6667	920
			480.687	16.0229									4700	235	117.5	78.3333	31.3333	940
			500.149	3.33433									4800	240	120	80	32	960
			1250.37	8.33581									4900	245	122.5	81.6667	32.6667	980
			2500.74	16.6716									5000	250	125	83.3333	33.3333	1000
			469.274	23.4637									5100	255	127.5	85	34	1020
			474.305	20.1832									5200	260	130	86.6667	34.6667	1040
													5300	265	132.5	88.3333	35.3333	1060
													5400	270	135	90	36	1080
													5500	275	137.5	91.6667	36.6667	1100
													5600	280	140	93.3333	37.3333	1120
													5700	285	142.5	95	38	1140
													5800	290	145	96.6667	38.6667	1160
													5900	295	147.5	98.3333	39.3333	1180
													6000	300	150	100	40	1200
													6100	305	152.5	101.667	40.6667	1220
													6200	310	155	103.333	41.3333	1240
													6300	315	157.5	105	42	1260
													6400	320	160	106.667	42.6667	1280
													6500	325	162.5	108.333	43.3333	1300
													6600	330	165	110	44	1320
													6700	335	167.5	111.667	44.6667	1340
													6800	340	170	113.333	45.3333	1360
													6900	345	172.5	115	46	1380
													7000	350	175	116.667	46.6667	1400
													7100	355	177.5	118.333	47.3333	1420
													7200	360	180	120	48	1440
													7300	365	182.5	121.667	48.6667	1460
													7400	370	185	123.333	49.3333	1480
													7500	375	187.5	125	50	1500
													7600	380	190	126.667	50.6667	1520
													7700	385	192.5	128.333	51.3333	1540
													7800	390	195	130	52	1560
													7900	395	197.5	131.667	52.6667	1580
													8000	400	200	133.333	53.3333	1600
													8100	405	202.5	135	54	1620
													8200	410	205	136.667	54.6667	1640
													8300	415	207.5	138.333	55.3333	1660
													8400	420	210	140	56	1680
													8500	425	212.5	141.667	56.6667	1700
													8600	430	215	143.333	57.3333	1720
													8700	435	217.5	145	58	1740
													8800	440	220	146.667	58.6667	1760
													8900	445	222.5	148.333	59.3333	1780
													9000	450	225	150	60	1800
													9100	455	227.5	151.667	60.6667	1820
													9200	460	230	153.333	61.3333	1840
													9300	465	232.5	155	62	1860
													9400	470	235	156.667	62.6667	1880
													9500	475	237.5	158.333	63.3333	1900
													9600	480	240	160	64	1920
													9700	485	242.5	161.667	64.6667	1940
													9800	490	245	163.333	65.3333	1960
													9900	495	247.5	165	66	1980
													10000	500	250	166.667	66.6667	2000
													10100	505	252.5	168.333	67.3333	2020
													10200	510	255	170	68	2040
													10300	515	257.5	171.667	68.6667	2060
													10400	520	260	173.333	69.3333	2080
													10500	525	262.5	175	70	2100
													10600	530	265	176.667	70.6667	2120
													10700	535	267.5	178.333	71.3333	2140
													10800	540	270	180	72	2160
													10900	545	272.5	181.667	72.6667	2180
													11000	550	275	183.333	73.3333	2200
													11100	555	277.5	185	74	2220
													11200	560	280	186.667	74.6667	2240
													11300	565	282.5	188.333	75.3333	2260
													11400	570	285	190	76	2280
													11500	575	287.5	191.667	76.6667	2300
													11600	580	290	193.333	77.3333	2320
													11700	585	292.5	195	78	2340
													11800	590	295	196.667	78.6667	2360
													11900	595	297.5	198.333	79.3333	2380
													12000	600	300	200	80	2400
													12100	605	302.5	201.667	80.6667	2420
													12200	610	305	203.333	81.3333	2440
													12300	615	307.5	205	82	2460
													12400	620	310	206.667	82.6667	2480
													12500	625	312.5	208.333	83.3333	2500
													12600	630	315	210	84	2520
													12700	635	317.5	211.667	84.6667	2540
													12800	640	320	213.333	85.3333	2560
													12900	645	322.5	215	86	2580
													13000	650	325	216.667	86.6667	2600
													13100	655	327.5	218.333	87.3333	2620
													13200	660	330	220	88	2640
													13300	665	332.5	221.667	88.6667	2660
													13400	670	335	223.333	89.3333	2680
													13500	675	337.5	225	90	2700
													13600	680	340	226.667	90.6667	2720
													13700	685	342.5	228.333	91.3333	2740
													13800	690	345	230	92	2760
													13900	695	347.5	231.667	92.6667	2780
													14000	700	350	233.333	93.3333	2800
													14100	705	352.5	235	94	2820
													14200	710	355	236.667	94.6667	2840
													14300	715	357.5	238.333	95.3333	2860
													14400	720	360	240	96	2880
													14500	725	362.5	241.667	96.6667	2900
													14600	730	365	243.333	97.3333	2920
													14700	735	367.5	245	98	2940
													14800	740	370	246.667	98.6667	2960
													14900	745	372.5	248.333	99.3333	2980
													15000	750	375	250	100	3000
													15100	755	377.5	251.667	100.667	3020
													15200	760	380	253.333	101.333	3040
													15300	765	382.5	255	102	3060
													15400	770	385	256.667	102.667	3080
													15500	775	387.5	258.333	103.333	3100
													15600	780	390	260	104	3120
													15700	785	392.5	261.667	104.667	3140
													15800	790	395	263.333	105.333	3160
													15900	795	397.5	265	106	3180
													16000	800	400	266.667	106.667	3200
													16100	805	402.5	268.333	107.333	3220
													16200	810	405	270	108	3240
													16300	815	407.5	271.667	108.667	3260
													16400	820	410	273.333	109.333	3280
													16500	825	412.5	275	110	3300
													16600	830	415	276.667	110.667	3320
													16700	835	417.5	278.333	111.333	3340
													16800	840	420	280	112	3360
													16900	845	422.5	281.667	112.667	3380
													17000	850	425	283.333	113.333	3400
													17100	855	427.5	285	114	3420
													17200	860	430	286.667	114.667	3440
													17300	865	432.5	288.333	115.333	3460
													17400	870	435	290	116	3480
													17500	875	437.5	291.667	116.667	3500
													17600	880	440	293.333	117.333	3520
													17700	885	442.5	295	118	3540
													17800	890	445	296.667	118.667	3560
													17900	895	447.5	298.333	119.333	3580
													18000	900	450	300	120	3600
													18100	905	452.5	301.667	120.667	3620
													18200	910	455	303.333	121.333	3640
													18300	915	457.5	305	122	3660
													18400	920	460	306.667	122.667	3680
													18500	925	462.5	308.333	123.333	3700
													18600	930	465	310	124	3720
													18700	935	467.5	311.667	124.667	3740
													18800	940	470	313.333	125.333	3760
													18900	945	472.5	315	126	3780
													19000	950	475	316.667	126.667	3800
													19100	955	477.5	318.333	127.333	3820
													19200	960	480	320	128	3840
													19300	965	482.5	321.667	128.667	3860
													19400	970	485	323.333	129.333	3880
													19500	975	487.5	325	130	3900
													19600	980	490	326.667	130.667	3920
													19700	985	492.5	328.333	131.333	3940
													19800	990	495	330	132	3960
													19900	995	497.5	331.667	132.667	3980
													20000	1000	500	333.333	133.333	4000

## Sheet: Fig. 2B
LBL			PA			NFX			NF90			NF270			mg rejection (%)	li rejection (%)	li rejection (%)	li rejection (%)	li rejection (%)
mg rejection (%)	li rejection (%)		mg rejection (%)	li rejection (%)		mg rejection (%)	li rejection (%)		mg rejection (%)	li rejection (%)		mg rejection (%)	li rejection (%)		40	-200	-500	-1400	-2900
99.8516	58.6053		65	-80		89.093	-84.0708		96.576	28.7611		51.7007	-10.177		41	-195	-490	-1375	-2850
99.8855	57.5949		60	-10		73.6952	-72.8		94.9478	3.2		38.8309	-8		42	-190	-480	-1350	-2800
99.8899	58.0023		60	-20		85.5439	-122.222		94.8745	5.08274		46.8619	-12.1749		43	-185	-470	-1325	-2750
99.6984	24.5581		46	-40.7		86.2353	-79.7441		96.1059	15.565		51.8824	-10.2345		44	-180	-460	-1300	-2700
99.435	-40.8333		80	45		86.3043	-89.7507		95.8043	4.70914		49.8551	-15.374		45	-175	-450	-1275	-2650
98.9885	-55		94	87											46	-170	-440	-1250	-2600
99.703	22.1057		89	33											47	-165	-430	-1225	-2550
99.724	29.552		99.5	62											48	-160	-420	-1200	-2500
99.8	33.9602		85	41											49	-155	-410	-1175	-2450
99.4201	-13.7688		99	65											50	-150	-400	-1150	-2400
99.1179	-55.8333		86	45											51	-145	-390	-1125	-2350
98.4863	-90.6977		98	77.5											52	-140	-380	-1100	-2300
99	28.61		88	-116											53	-135	-370	-1075	-2250
98.9	27.99		94	-47											54	-130	-360	-1050	-2200
99	25.73		92.5	-27.5											55	-125	-350	-1025	-2150
98	-22.06		92	-36											56	-120	-340	-1000	-2100
96.5	-60.22		88	-56											57	-115	-330	-975	-2050
			91	-98											58	-110	-320	-950	-2000
			91	-125											59	-105	-310	-925	-1950
			90	-140											60	-100	-300	-900	-1900
			96	-20											61	-95	-290	-875	-1850
			96	-44											62	-90	-280	-850	-1800
			96	-70											63	-85	-270	-825	-1750
			95	-110											64	-80	-260	-800	-1700
			97	20											65	-75	-250	-775	-1650
			97.2	6.5											66	-70	-240	-750	-1600
			97.3	7											67	-65	-230	-725	-1550
			97.3	6.5											68	-60	-220	-700	-1500
			96.7	6.7											69	-55	-210	-675	-1450
			96.1	6											70	-50	-200	-650	-1400
			97.5	37.5											71	-45	-190	-625	-1350
			92	-50											72	-40	-180	-600	-1300
			80	-37											73	-35	-170	-575	-1250
			80	-37											74	-30	-160	-550	-1200
			95.1	22											75	-25	-150	-525	-1150
			96.11	21.76											76	-20	-140	-500	-1100
			95.59	11.63											77	-15	-130	-475	-1050
			95	19											78	-10	-120	-450	-1000
			95	18											79	-5	-110	-425	-950
			86.5	-26											80	0	-100	-400	-900
			82	-45											81	5	-90	-375	-850
			80	-49											82	10	-80	-350	-800
			75	-55											83	15	-70	-325	-750
			92.3	29											84	20	-60	-300	-700
			91.5	-10											85	25	-50	-275	-650
			98.64	21.58											86	30	-40	-250	-600
			94.65	22.86											87	35	-30	-225	-550
			89.1	-30.88											88	40	-20	-200	-500
			84.66	-38.08											89	45	-10	-175	-450
			79.6	-43.09											90	50	0	-150	-400
			97.4	5											91	55	10	-125	-350
			91.5	32.3											92	60	20	-100	-300
															93	65	30	-75	-250
															94	70	40	-50	-200
															95	75	50	-25	-150
															96	80	60	0	-100
															97	85	70	25	-50
															98	90	80	50	0
															99	95	90	75	50
															99.9	99.5	99	97.5	95

## Sheet: Fig. 2C
LBL			PA			NFX			NF90			NF270
mg rejection	selectivity		mg rejection	selectivity		mg rejection	selectivity		mg rejection	selectivity		mg rejection	selectivity
99.8516	278.977		65	5.14286		89.093	16.8763		96.576	20.8055		51.7007	2.28113
99.8855	370.253		60	2.75		73.6952	6.56914		94.9478	19.16		38.8309	1.7656
99.8899	381.579		60	3		85.5439	15.3722		94.8745	18.5186		46.8619	2.11101
99.6984	250.164		46	2.60556		86.2353	13.0583		96.1059	21.6827		51.8824	2.29094
99.435	249.245		80	2.75		86.3043	13.8548		95.8043	22.7118		49.8551	2.30081
98.9885	153.245		94	2.16667
99.703	262.263		89	6.09091
99.724	255.246		99.5	76
99.8	330.199		85	3.93333
99.4201	196.174		99	35
99.1179	176.659		86	3.92857
98.4863	125.979		98	11.25
99	71.39		88	18
98.9	65.4636		94	24.5
99	74.27		92.5	17
98	61.03		92	17
96.5	45.7771		88	13
			91	22
			91	25
			90	24
			96	30
			96	36
			96	42.5
			95	42
			97	26.6667
			97.2	33.3929
			97.3	34.4444
			97.3	34.6296
			96.7	28.2727
			96.1	24.1026
			97.5	25
			92	18.75
			80	6.85
			80	6.85
			95.1	15.9184
			96.11	20.1131
			95.59	20.0385
			95	16.2
			95	16.4
			86.5	9.33333
			82	8.05556
			80	7.45
			75	6.2
			92.3	9.22078
			91.5	12.9412
			98.64	57.6618
			94.65	14.4187
			89.1	12.0073
			84.66	9.0013
			79.6	7.01422
			97.4	36.5385
			91.5	7.96471

## Sheet: Fig. 2D
LBL			PA			NFX			NF90			NF270			Purity	0.99	0.9	0.7	0.5	0.3	0.1
MLR	S		MLR	S		MLR	S		MLR	S		MLR	S		MLR	p0.99	p0.9	p0.7	p0.5	p0.3	p0.1
20	278.977		60	5.14286		20	16.8763		20	20.8055		20	2.28113		0.1	9.9	0.9	0.233333	0.1	0.0428571	0.0111111
40	370.253		43.8258	2.75		40	6.56914		40	19.16		40	1.7656		1	99	9	2.33333	1	0.428571	0.111111
60	381.579		63.5744	3		60	15.3722		60	18.5186		60	2.11101		2	198	18	4.66667	2	0.857143	0.222222
20	250.164		20	2.60556		20	13.0583		20	21.6827		20	2.29094		3	297	27	7	3	1.28571	0.333333
20	249.245		20	2.75		20	13.8548		20	22.7118		20	2.30081		4	396	36	9.33333	4	1.71429	0.444444
20	153.245		20	2.16667											5	495	45	11.6667	5	2.14286	0.555556
20	262.263		5	6.09091											6	594	54	14	6	2.57143	0.666667
40	255.246		5	76											7	693	63	16.3333	7	3	0.777778
60	330.199		10	3.93333											8	792	72	18.6667	8	3.42857	0.888889
20	196.174		10	35											9	891	81	21	9	3.85714	1
20	176.659		15	3.92857											10	990	90	23.3333	10	4.28571	1.11111
20	125.979		15	11.25											11	1089	99	25.6667	11	4.71429	1.22222
20	71.39		20	18											12	1188	108	28	12	5.14286	1.33333
40	65.4636		20	24.5											13	1287	117	30.3333	13	5.57143	1.44444
60	74.27		20	17											14	1386	126	32.6667	14	6	1.55556
20	61.03		20	17											15	1485	135	35	15	6.42857	1.66667
20	45.7771		30	13											16	1584	144	37.3333	16	6.85714	1.77778
			30	22											17	1683	153	39.6667	17	7.28571	1.88889
			30	25											18	1782	162	42	18	7.71429	2
			30	24											19	1881	171	44.3333	19	8.14286	2.11111
			40	30											20	1980	180	46.6667	20	8.57143	2.22222
			40	36											21	2079	189	49	21	9	2.33333
			40	42.5											22	2178	198	51.3333	22	9.42857	2.44444
			40	42											23	2277	207	53.6667	23	9.85714	2.55556
			20	26.6667											24	2376	216	56	24	10.2857	2.66667
			20	33.3929											25	2475	225	58.3333	25	10.7143	2.77778
			10	34.4444											26	2574	234	60.6667	26	11.1429	2.88889
			40	34.6296											27	2673	243	63	27	11.5714	3
			20	28.2727											28	2772	252	65.3333	28	12	3.11111
			20	24.1026											29	2871	261	67.6667	29	12.4286	3.22222
			73	25											30	2970	270	70	30	12.8571	3.33333
			73	18.75											31	3069	279	72.3333	31	13.2857	3.44444
			73	6.85											32	3168	288	74.6667	32	13.7143	3.55556
			73	6.85											33	3267	297	77	33	14.1429	3.66667
			20	15.9184											34	3366	306	79.3333	34	14.5714	3.77778
			30	20.1131											35	3465	315	81.6667	35	15	3.88889
			60	20.0385											36	3564	324	84	36	15.4286	4
			20	16.2											37	3663	333	86.3333	37	15.8571	4.11111
			21.4	16.4											38	3762	342	88.6667	38	16.2857	4.22222
			15.3383	9.33333											39	3861	351	91	39	16.7143	4.33333
			30.6767	8.05556											40	3960	360	93.3333	40	17.1429	4.44444
			46.015	7.45											41	4059	369	95.6667	41	17.5714	4.55556
			61.3534	6.2											42	4158	378	98	42	18	4.66667
			24	9.22078											43	4257	387	100.333	43	18.4286	4.77778
			21.4	12.9412											44	4356	396	102.667	44	18.8571	4.88889
			20	57.6618											45	4455	405	105	45	19.2857	5
			30	14.4187											46	4554	414	107.333	46	19.7143	5.11111
			150	12.0073											47	4653	423	109.667	47	20.1429	5.22222
			150	9.0013											48	4752	432	112	48	20.5714	5.33333
			150	7.01422											49	4851	441	114.333	49	21	5.44444
			20	36.5385											50	4950	450	116.667	50	21.4286	5.55556
			23.5	7.96471											51	5049	459	119	51	21.8571	5.66667
															52	5148	468	121.333	52	22.2857	5.77778
															53	5247	477	123.667	53	22.7143	5.88889
															54	5346	486	126	54	23.1429	6
															55	5445	495	128.333	55	23.5714	6.11111
															56	5544	504	130.667	56	24	6.22222
															57	5643	513	133	57	24.4286	6.33333
															58	5742	522	135.333	58	24.8571	6.44444
															59	5841	531	137.667	59	25.2857	6.55556
															60	5940	540	140	60	25.7143	6.66667
															61	6039	549	142.333	61	26.1429	6.77778
															62	6138	558	144.667	62	26.5714	6.88889
															63	6237	567	147	63	27	7
															64	6336	576	149.333	64	27.4286	7.11111
															65	6435	585	151.667	65	27.8571	7.22222
															66	6534	594	154	66	28.2857	7.33333
															67	6633	603	156.333	67	28.7143	7.44444
															68	6732	612	158.667	68	29.1429	7.55556
															69	6831	621	161	69	29.5714	7.66667
															70	6930	630	163.333	70	30	7.77778
															71	7029	639	165.667	71	30.4286	7.88889
															72	7128	648	168	72	30.8571	8
															73	7227	657	170.333	73	31.2857	8.11111
															74	7326	666	172.667	74	31.7143	8.22222
															75	7425	675	175	75	32.1429	8.33333
															76	7524	684	177.333	76	32.5714	8.44444
															77	7623	693	179.667	77	33	8.55556
															78	7722	702	182	78	33.4286	8.66667
															79	7821	711	184.333	79	33.8571	8.77778
															80	7920	720	186.667	80	34.2857	8.88889
															81	8019	729	189	81	34.7143	9
															82	8118	738	191.333	82	35.1429	9.11111
															83	8217	747	193.667	83	35.5714	9.22222
															84	8316	756	196	84	36	9.33333
															85	8415	765	198.333	85	36.4286	9.44444
															86	8514	774	200.667	86	36.8571	9.55556
															87	8613	783	203	87	37.2857	9.66667
															88	8712	792	205.333	88	37.7143	9.77778
															89	8811	801	207.667	89	38.1429	9.88889
															90	8910	810	210	90	38.5714	10
															91	9009	819	212.333	91	39	10.1111
															92	9108	828	214.667	92	39.4286	10.2222
															93	9207	837	217	93	39.8571	10.3333
															94	9306	846	219.333	94	40.2857	10.4444
															95	9405	855	221.667	95	40.7143	10.5556
															96	9504	864	224	96	41.1429	10.6667
															97	9603	873	226.333	97	41.5714	10.7778
															98	9702	882	228.667	98	42	10.8889
															99	9801	891	231	99	42.4286	11
															100	9900	900	233.333	100	42.8571	11.1111
															101	9999	909	235.667	101	43.2857	11.2222
															102	10098	918	238	102	43.7143	11.3333
															103	10197	927	240.333	103	44.1429	11.4444
	0.5														104	10296	936	242.667	104	44.5714	11.5556
															105	10395	945	245	105	45	11.6667
															106	10494	954	247.333	106	45.4286	11.7778
															107	10593	963	249.667	107	45.8571	11.8889
															108	10692	972	252	108	46.2857	12
															109	10791	981	254.333	109	46.7143	12.1111
															110	10890	990	256.667	110	47.1429	12.2222
															111	10989	999	259	111	47.5714	12.3333
															112	11088	1008	261.333	112	48	12.4444
															113	11187	1017	263.667	113	48.4286	12.5556
															114	11286	1026	266	114	48.8571	12.6667
															115	11385	1035	268.333	115	49.2857	12.7778
															116	11484	1044	270.667	116	49.7143	12.8889
															117	11583	1053	273	117	50.1429	13
															118	11682	1062	275.333	118	50.5714	13.1111
															119	11781	1071	277.667	119	51	13.2222
															120	11880	1080	280	120	51.4286	13.3333
															121	11979	1089	282.333	121	51.8571	13.4444
															122	12078	1098	284.667	122	52.2857	13.5556
															123	12177	1107	287	123	52.7143	13.6667
															124	12276	1116	289.333	124	53.1429	13.7778
															125	12375	1125	291.667	125	53.5714	13.8889
															126	12474	1134	294	126	54	14
															127	12573	1143	296.333	127	54.4286	14.1111
															128	12672	1152	298.667	128	54.8571	14.2222
															129	12771	1161	301	129	55.2857	14.3333
															130	12870	1170	303.333	130	55.7143	14.4444
															131	12969	1179	305.667	131	56.1429	14.5556
															132	13068	1188	308	132	56.5714	14.6667
															133	13167	1197	310.333	133	57	14.7778
															134	13266	1206	312.667	134	57.4286	14.8889
															135	13365	1215	315	135	57.8571	15
															136	13464	1224	317.333	136	58.2857	15.1111
															137	13563	1233	319.667	137	58.7143	15.2222
															138	13662	1242	322	138	59.1429	15.3333
															139	13761	1251	324.333	139	59.5714	15.4444
															140	13860	1260	326.667	140	60	15.5556
															141	13959	1269	329	141	60.4286	15.6667
															142	14058	1278	331.333	142	60.8571	15.7778
															143	14157	1287	333.667	143	61.2857	15.8889
															144	14256	1296	336	144	61.7143	16
															145	14355	1305	338.333	145	62.1429	16.1111
															146	14454	1314	340.667	146	62.5714	16.2222
															147	14553	1323	343	147	63	16.3333
															148	14652	1332	345.333	148	63.4286	16.4444
															149	14751	1341	347.667	149	63.8571	16.5556
															150	14850	1350	350	150	64.2857	16.6667
															151	14949	1359	352.333	151	64.7143	16.7778
															152	15048	1368	354.667	152	65.1429	16.8889
															153	15147	1377	357	153	65.5714	17
															154	15246	1386	359.333	154	66	17.1111
															155	15345	1395	361.667	155	66.4286	17.2222
															156	15444	1404	364	156	66.8571	17.3333
															157	15543	1413	366.333	157	67.2857	17.4444
															158	15642	1422	368.667	158	67.7143	17.5556
															159	15741	1431	371	159	68.1429	17.6667
															160	15840	1440	373.333	160	68.5714	17.7778
															161	15939	1449	375.667	161	69	17.8889
															162	16038	1458	378	162	69.4286	18
															163	16137	1467	380.333	163	69.8571	18.1111
															164	16236	1476	382.667	164	70.2857	18.2222
															165	16335	1485	385	165	70.7143	18.3333
															166	16434	1494	387.333	166	71.1429	18.4444
															167	16533	1503	389.667	167	71.5714	18.5556
															168	16632	1512	392	168	72	18.6667
															169	16731	1521	394.333	169	72.4286	18.7778
															170	16830	1530	396.667	170	72.8571	18.8889
															171	16929	1539	399	171	73.2857	19
															172	17028	1548	401.333	172	73.7143	19.1111
															173	17127	1557	403.667	173	74.1429	19.2222
															174	17226	1566	406	174	74.5714	19.3333
															175	17325	1575	408.333	175	75	19.4444
															176	17424	1584	410.667	176	75.4286	19.5556
															177	17523	1593	413	177	75.8571	19.6667
															178	17622	1602	415.333	178	76.2857	19.7778
															179	17721	1611	417.667	179	76.7143	19.8889
															180	17820	1620	420	180	77.1429	20
															181	17919	1629	422.333	181	77.5714	20.1111
															182	18018	1638	424.667	182	78	20.2222
															183	18117	1647	427	183	78.4286	20.3333
															184	18216	1656	429.333	184	78.8571	20.4444
															185	18315	1665	431.667	185	79.2857	20.5556
															186	18414	1674	434	186	79.7143	20.6667
															187	18513	1683	436.333	187	80.1429	20.7778
															188	18612	1692	438.667	188	80.5714	20.8889
															189	18711	1701	441	189	81	21
															190	18810	1710	443.333	190	81.4286	21.1111
															191	18909	1719	445.667	191	81.8571	21.2222
															192	19008	1728	448	192	82.2857	21.3333
															193	19107	1737	450.333	193	82.7143	21.4444
															194	19206	1746	452.667	194	83.1429	21.5556
															195	19305	1755	455	195	83.5714	21.6667
															196	19404	1764	457.333	196	84	21.7778
															197	19503	1773	459.667	197	84.4286	21.8889
															198	19602	1782	462	198	84.8571	22
															199	19701	1791	464.333	199	85.2857	22.1111
															200	19800	1800	466.667	200	85.7143	22.2222

## Sheet: Fig. 3
Panel (B)
LBL
solution	Li rejection	Mg rejection	Li (um/s)	Mg (um/s)	flux (LMH)	selectivity
2 g/L, 20:1	28.61	99	4.5411	0.0413	38	71.39
2 g/L, 40:1	27.99	98.9	4.1006	0.0411	36.5	65.4636
2 g/L, 60:1	25.73	99	4.0752	0.0362	36.2	74.27
4 g/L, 20:1	-22.06	98	5.2305	0.0504	22.3	61.03
6 g/L, 20:1	-60.22	96.5	6.4517	0.0729	17.8	45.7771
Panel (C)
LBL					NFX					NF90					NF270
fitted Mg (um/s)	fitted Li (um/s)	predicted Mg (um/s)	predicted Li (um/s)		fitted Mg (um/s)	fitted Li (um/s)	predicted Mg (um/s)	predicted Li (um/s)		fitted Mg (um/s)	fitted Li (um/s)	predicted Mg (um/s)	predicted Li (um/s)		fitted Mg (um/s)	fitted Li (um/s)	predicted Mg (um/s)	predicted Li (um/s)
4.5411	0.0413	4.4428	0.0396		7.0209	0.1514	7.6315	0.2047		1.6385	0.0498	1.7487	0.0527		65.6935	8.8632	70.2126	9.7578
4.1006	0.0411	4.1464	0.0385		9.9555	0.4193	8.62	0.2679		2.1435	0.0684	2.0286	0.0659		127.474	18.346	97.4044	13.6002
4.0752	0.0362	4.044	0.0382		8.1418	0.1897	9.0447	0.2948		2.0491	0.0687	2.1213	0.0702		80.8656	10.9275	104.743	14.6764
5.2305	0.0504	5.3946	0.0549		7.2303	0.1813	6.8908	0.1668		1.5911	0.0447	1.4649	0.0412		64.3003	8.5847	66.1505	8.5573
6.4517	0.0729	6.3713	0.0707		6.1858	0.1362	6.3473	0.1437		1.1689	0.0305	1.2276	0.0321		66.4311	7.8034	66.2546	7.9331

## Sheet: Fig. 4
Panel (A)					Panel (B)							Panel (C)						Panel (D)			Panel (E)				Panel (F)
						local	cumulative	local	cumulative				local	cumulative	local	cumulative
WR	C_Li (mM)	C_Mg (mM)	MLR		WR	C_Li (mM)	C_Li (mM)	C_Mg (mM)	C_Mg (mM)	flux (LMH)		WR	li rejection	li rejection	mg rejection	mg rejection		WR	MLR		WR	local selectivity	cum selectivity		WR	lithium recovery
0	3.4	19.6	19.7647		0	2.126	2.126	0.2589	0.2589	65.2603		0	37.47	37.47	98.68	98.68		0	19.7647		0	47.3428	47.3428		0	0
0.05	3.4653	20.6175	20.3989		0.05	2.2065	2.1669	0.2805	0.2695	63.7415		0.05	36.33	36.27	98.64	98.62		0.05	20.3989		0.05	46.7938	46.3467		0.05	0.0317
0.1	3.5334	21.7468	21.1016		0.1	2.2912	2.2077	0.3055	0.2812	62.1037		0.1	35.16	35.07	98.6	98.57		0.1	21.1016		0.1	46.1526	45.2562		0.1	0.0647
0.15	3.6043	23.0074	21.8855		0.15	2.3849	2.2511	0.3347	0.2942	60.3336		0.15	33.83	33.79	98.55	98.5		0.15	21.8855		0.15	45.4828	44.1141		0.15	0.0989
0.2	3.678	24.4236	22.7673		0.2	2.4891	2.2976	0.3691	0.3086	58.413		0.2	32.32	32.42	98.49	98.43		0.2	22.7673		0.2	44.7813	42.9171		0.2	0.1346
0.25	3.7542	26.0262	23.7688		0.25	2.6062	2.3477	0.4102	0.3249	56.3202		0.25	30.58	30.95	98.42	98.34		0.25	23.7688		0.25	44.0441	41.6587		0.25	0.1719
0.3	3.8325	27.8545	24.9187		0.3	2.7388	2.402	0.4601	0.3433	54.0291		0.3	28.54	29.35	98.35	98.25		0.3	24.9187		0.3	43.2661	40.3306		0.3	0.211
0.35	3.9121	29.96	26.257		0.35	2.8907	2.4612	0.5216	0.3645	51.5073		0.35	26.11	27.61	98.26	98.14		0.35	26.257		0.35	42.441	38.9221		0.35	0.2521
0.4	3.9915	32.4107	27.8396		0.4	3.067	2.5262	0.5992	0.3892	48.715		0.4	23.16	25.7	98.15	98.01		0.4	27.8396		0.4	41.5599	37.4196		0.4	0.2956
0.45	4.0683	35.2992	29.7487		0.45	3.2748	2.5983	0.6997	0.4183	45.6025		0.45	19.5	23.58	98.02	97.87		0.45	29.7487		0.45	40.6106	35.8051		0.45	0.3419
0.5	4.138	38.7541	32.1099		0.5	3.5247	2.6789	0.8341	0.4535	42.1067		0.5	14.82	21.21	97.85	97.69		0.5	32.1099		0.5	39.5746	34.0537		0.5	0.3915
0.55	4.1931	42.9597	35.1269		0.55	3.8323	2.7704	1.0219	0.4971	38.1473		0.55	8.6	18.52	97.62	97.46		0.55	35.1269		0.55	38.4225	32.1304		0.55	0.445
0.6	4.2197	48.1892	39.1549		0.6	4.2227	2.876	1.2998	0.553	33.6219		0.6	-0.07	15.41	97.3	97.18		0.6	39.1549		0.6	37.1019	29.9824		0.6	0.5036
0.65	4.1916	54.8649	44.8776		0.65	4.7367	3.0005	1.7461	0.6284	28.404		0.65	-13.01	11.75	96.82	96.79		0.65	44.8776		0.65	35.5071	27.524		0.65	0.5685
0.7	4.0572	63.6712	53.8054		0.7	5.438	3.151	2.5566	0.7383	22.3548		0.7	-34.03	7.32	95.98	96.23		0.7	53.8054		0.7	33.3796	24.6024		0.7	0.642
0.75	3.7082	75.776	70.0617		0.75	6.3916	3.338	4.357	0.9205	15.4306		0.75	-72.36	1.82	94.25	95.3		0.75	70.0617		0.75	29.9768	20.9047		0.75	0.7273
0.8	2.9442	93.2167	108.552		0.8	7.074	3.5579	9.8724	1.3029	8.2146		0.8	-140.27	-4.64	89.41	93.35		0.8	108.552		0.8	22.6865	15.7414		0.8	0.8268

## Sheet: Fig. 5A
1 bar				2 bar				4 bar				6 bar				8 bar
WR	S(cum.)	Li recovery		WR	S(cum.)	Li recovery		WR	S(cum.)	Li recovery		WR	S(cum.)	Li recovery		WR	S(cum.)	Li recovery
0	17.1269	0		0	51.3549	0		0	53.3728	0		0	47.3428	0		0	41.1809	0
0.01	16.6589	0.0236		0.01	50.8468	0.0143		0.01	53.076	0.0076		0.01	47.1693	0.0063		0.01	41.0356	0.0059
0.02	16.2135	0.0469		0.02	50.3349	0.0287		0.02	52.7888	0.0153		0.02	46.9717	0.0126		0.02	40.8738	0.0119
0.03	15.7547	0.07		0.03	49.8183	0.0431		0.03	52.5023	0.0231		0.03	46.7669	0.0189		0.03	40.7071	0.018
0.04	15.3108	0.0928		0.04	49.2965	0.0577		0.04	52.2144	0.0309		0.04	46.5583	0.0253		0.04	40.5376	0.024
0.05	14.8692	0.1154		0.05	48.7695	0.0723		0.05	51.9246	0.0387		0.05	46.3467	0.0317		0.05	40.3661	0.0301
0.06	14.4331	0.1376		0.06	48.237	0.087		0.06	51.6324	0.0466		0.06	46.1328	0.0382		0.06	40.1929	0.0363
0.07	14.0025	0.1596		0.07	47.699	0.1018		0.07	51.3378	0.0546		0.07	45.9168	0.0448		0.07	40.0181	0.0425
0.08	13.5781	0.1813		0.08	47.1551	0.1166		0.08	51.0406	0.0627		0.08	45.6986	0.0514		0.08	39.8419	0.0487
0.09	13.1571	0.2026		0.09	46.6053	0.1316		0.09	50.7407	0.0708		0.09	45.4784	0.058		0.09	39.6641	0.055
0.1	12.7451	0.2236		0.1	46.0493	0.1466		0.1	50.438	0.0789		0.1	45.2562	0.0647		0.1	39.4849	0.0613
				0.11	45.4871	0.1617		0.11	50.1324	0.0872		0.11	45.0319	0.0714		0.11	39.3042	0.0677
				0.12	44.9183	0.1769		0.12	49.8238	0.0955		0.12	44.8056	0.0782		0.12	39.1221	0.0741
				0.13	44.3429	0.1922		0.13	49.5121	0.1039		0.13	44.5772	0.0851		0.13	38.9384	0.0805
				0.14	43.7605	0.2075		0.14	49.1973	0.1123		0.14	44.3468	0.092		0.14	38.7533	0.087
				0.15	43.171	0.223		0.15	48.8792	0.1208		0.15	44.1141	0.0989		0.15	38.5665	0.0936
				0.16	42.5741	0.2385		0.16	48.5578	0.1294		0.16	43.8793	0.1059		0.16	38.3782	0.1002
				0.17	41.9696	0.2541		0.17	48.233	0.1381		0.17	43.6422	0.113		0.17	38.1883	0.1068
				0.18	41.3572	0.2698		0.18	47.9046	0.1469		0.18	43.4029	0.1201		0.18	37.9968	0.1135
				0.19	40.7367	0.2856		0.19	47.5727	0.1557		0.19	43.1612	0.1273		0.19	37.8036	0.1203
				0.2	40.1078	0.3014		0.2	47.237	0.1646		0.2	42.9171	0.1346		0.2	37.6086	0.1271
				0.21	39.4696	0.3174		0.21	46.8976	0.1736		0.21	42.6705	0.1419		0.21	37.412	0.1339
				0.22	38.8224	0.3334		0.22	46.5541	0.1827		0.22	42.4215	0.1493		0.22	37.2135	0.1408
				0.23	38.1656	0.3496		0.23	46.2067	0.1918		0.23	42.1699	0.1568		0.23	37.0132	0.1478
				0.24	37.4991	0.3658		0.24	45.855	0.2011		0.24	41.9156	0.1643		0.24	36.811	0.1548
				0.25	36.8225	0.3821		0.25	45.4991	0.2104		0.25	41.6587	0.1719		0.25	36.6069	0.1619
				0.26	36.1366	0.3984		0.26	45.1387	0.2199		0.26	41.3989	0.1795		0.26	36.4008	0.1691
				0.27	35.4399	0.4148		0.27	44.7737	0.2294		0.27	41.1363	0.1873		0.27	36.1927	0.1763
				0.28	34.732	0.4313		0.28	44.404	0.239		0.28	40.8708	0.1951		0.28	35.9825	0.1835
				0.29	34.0125	0.4479		0.29	44.0294	0.2488		0.29	40.6022	0.203		0.29	35.7702	0.1909
				0.3	33.281	0.4645		0.3	43.6497	0.2586		0.3	40.3306	0.211		0.3	35.5557	0.1983
				0.31	32.5371	0.4811		0.31	43.2648	0.2686		0.31	40.0557	0.219		0.31	35.339	0.2057
				0.32	31.7804	0.4978		0.32	42.8745	0.2786		0.32	39.7775	0.2271		0.32	35.12	0.2133
				0.33	31.0104	0.5146		0.33	42.4785	0.2888		0.33	39.4959	0.2354		0.33	34.8985	0.2209
				0.34	30.2269	0.5313		0.34	42.0767	0.2991		0.34	39.2108	0.2437		0.34	34.6746	0.2286
				0.35	29.4295	0.5481		0.35	41.6689	0.3095		0.35	38.9221	0.2521		0.35	34.4482	0.2364
				0.36	28.6179	0.5649		0.36	41.2556	0.3201		0.36	38.6296	0.2606		0.36	34.2192	0.2442
				0.37	27.7665	0.5816		0.37	40.8357	0.3307		0.37	38.3333	0.2692		0.37	33.9875	0.2521
				0.38	26.9285	0.5981		0.38	40.4088	0.3416		0.38	38.0329	0.2779		0.38	33.7531	0.2601
				0.39	26.077	0.6147		0.39	39.9747	0.3525		0.39	37.7284	0.2867		0.39	33.5158	0.2682
				0.4	25.2108	0.6313		0.4	39.5331	0.3636		0.4	37.4196	0.2956		0.4	33.2755	0.2764
				0.41	24.3299	0.6477		0.41	39.0837	0.3748		0.41	37.1064	0.3046		0.41	33.0322	0.2847
				0.42	23.4387	0.6639		0.42	38.6261	0.3862		0.42	36.7885	0.3138		0.42	32.7857	0.293
				0.43	22.5348	0.6799		0.43	38.16	0.3978		0.43	36.4657	0.323		0.43	32.536	0.3015
				0.44	21.6238	0.6957		0.44	37.6848	0.4095		0.44	36.138	0.3324		0.44	32.2828	0.31
				0.45	20.706	0.7112		0.45	37.2003	0.4213		0.45	35.8051	0.3419		0.45	32.0261	0.3187
				0.46	19.7834	0.7264		0.46	36.706	0.4334		0.46	35.4667	0.3515		0.46	31.7658	0.3274
				0.47	18.8632	0.7412		0.47	36.2012	0.4456		0.47	35.1226	0.3613		0.47	31.5016	0.3363
				0.48	17.9478	0.7555		0.48	35.6855	0.458		0.48	34.7726	0.3712		0.48	31.2335	0.3453
				0.49	17.0423	0.7693		0.49	35.1582	0.4707		0.49	34.4164	0.3813		0.49	30.9613	0.3544
								0.5	34.6186	0.4835		0.5	34.0537	0.3915		0.5	30.6848	0.3636
								0.51	34.0661	0.4965		0.51	33.6842	0.4018		0.51	30.4038	0.373
								0.52	33.4997	0.5097		0.52	33.3075	0.4124		0.52	30.1181	0.3825
								0.53	32.9186	0.5232		0.53	32.9232	0.4231		0.53	29.8274	0.3921
								0.54	32.3219	0.5369		0.54	32.531	0.434		0.54	29.5316	0.4019
								0.55	31.7085	0.5508		0.55	32.1304	0.445		0.55	29.2304	0.4118
								0.56	31.0771	0.565		0.56	31.7209	0.4563		0.56	28.9236	0.4219
								0.57	30.4264	0.5795		0.57	31.302	0.4678		0.57	28.6107	0.4321
								0.58	29.7548	0.5942		0.58	30.873	0.4795		0.58	28.2915	0.4425
								0.59	29.06	0.6093		0.59	30.4334	0.4914		0.59	27.9653	0.4531
								0.6	28.3407	0.6246		0.6	29.9824	0.5036		0.6	27.632	0.4638
								0.61	27.5947	0.6402		0.61	29.5191	0.516		0.61	27.2913	0.4748
								0.62	26.8197	0.6561		0.62	29.0427	0.5287		0.62	26.9427	0.4859
								0.63	26.0145	0.6724		0.63	28.5522	0.5416		0.63	26.5855	0.4973
								0.64	25.175	0.6889		0.64	28.0464	0.5549		0.64	26.2192	0.5089
								0.65	24.2982	0.7058		0.65	27.524	0.5685		0.65	25.8432	0.5208
								0.66	23.3795	0.7229		0.66	26.9835	0.5824		0.66	25.4567	0.5329
								0.67	22.4174	0.7402		0.67	26.4232	0.5967		0.67	25.0588	0.5453
								0.68	21.4071	0.7578		0.68	25.8411	0.6114		0.68	24.6486	0.558
								0.69	20.3471	0.7755		0.69	25.2351	0.6265		0.69	24.225	0.571
								0.7	19.2367	0.7932		0.7	24.6024	0.642		0.7	23.7868	0.5843
								0.71	18.0775	0.8109		0.71	23.9397	0.658		0.71	23.3324	0.598
								0.72	16.8763	0.8282		0.72	23.2434	0.6745		0.72	22.8603	0.6121
												0.73	22.5091	0.6915		0.73	22.3683	0.6267
												0.74	21.7315	0.7091		0.74	21.8542	0.6416
												0.75	20.9047	0.7273		0.75	21.3152	0.6571
												0.76	20.0207	0.7461		0.76	20.7477	0.6731
												0.77	19.0713	0.7655		0.77	20.1477	0.6897
												0.78	18.0472	0.7855		0.78	19.51	0.707
												0.79	16.9396	0.806		0.79	18.828	0.7249
												0.8	15.7414	0.8268		0.8	18.0937	0.7437
																0.81	17.2971	0.7633
																0.82	16.4248	0.7837
																0.83	15.4609	0.8051

## Sheet: Fig. 5B
2 g/L, 20:1			6 g/L, 20:1
flux (LMH)	S(local)		flux (LMH)	S(local)
112.452	35.5161		60.1492	30.5792
110.271	36.0935		58.5403	30.8903
108.069	36.637		56.9205	31.202
105.848	37.1889		55.286	31.5057
103.609	37.7495		53.6468	31.8222
101.349	38.2686		51.991	32.1237
99.0752	38.8807		50.3276	32.4291
96.778	39.4166		48.657	32.738
94.4667	40.0407		46.9708	33.0288
92.1322	40.5847		45.2784	33.321
89.7838	41.2285		43.5771	33.6057
87.4139	41.8214		41.8677	33.8813
85.0239	42.3815		40.1533	34.1513
82.6196	43.0473		38.4302	34.403
80.1942	43.6544		36.699	34.6329
77.7484	44.2142		34.968	34.8525
75.2825	44.7927		33.2298	35.0404
72.8031	45.433		31.494	35.2067
70.3055	46.0736		29.7547	35.3322
67.7901	46.7141		28.0219	35.4218
65.2608	47.3714		26.2895	35.4565
62.7104	48.0038		24.5673	35.4337
60.1429	48.6584		22.8571	35.3381
57.5588	49.2818		21.1573	35.1547
54.9587	49.9013		19.4784	34.8659
52.343	50.5146		17.8239	34.4475
49.7126	51.1191		16.1952	33.8798
47.068	51.7113		14.6003	33.1312
44.4103	52.2871		13.0435	32.1748
41.7406	52.8409		11.5352	30.9623
39.0603	53.3658		10.0804	29.4622
36.3711	53.8525		8.6892	27.6259
33.6753	54.2885		7.3651	25.4574
30.9754	54.6571		6.1236	22.9201
28.2749	54.935		4.9773	20.0457
25.5784	55.0895		3.943	16.9333
22.8916	55.0739
20.2211	54.8228
17.5793	54.2294
14.9782	53.1478
12.4353	51.3545
9.9749	48.5143
7.6281	44.1514
5.4362	37.6557
3.4599	28.4798
1.8276	17.1544

## Sheet: Fig. 6
LBL							PA							NFX							NF90							NF270
Pli (um/s)	Pmg (um/s)	Pli/PWP (bar)	Pli/Pmg	PWP (LMH/bar)	PWP/Pmg (bar-1)		Pli (um/s)	Pmg (um/s)	Pli/PWP (bar)	Pli/Pmg	PWP (LMH/bar)	PWP/Pmg (bar-1)		Pli (um/s)	Pmg (um/s)	Pli/PWP (bar)	Pli/Pmg	PWP (LMH/bar)	PWP/Pmg (bar-1)		Pli (um/s)	Pmg (um/s)	Pli/PWP (bar)	Pli/Pmg	PWP (LMH/bar)	PWP/Pmg (bar-1)		Pli (um/s)	Pmg (um/s)	Pli/PWP (bar)	Pli/Pmg	PWP (LMH/bar)	PWP/Pmg (bar-1)
0.8825	0.0021	0.402152	420.238	7.9	1044.97		32.2318	1.2123	18.9599	26.5873	6.12	1.40229		7.0209	0.1514	11.9788	46.3732	2.11	3.87128		1.6385	0.0498	1.78745	32.9016	3.3	18.407		65.6935	8.8632	12.0049	7.41194	19.7	0.617409
0.8524	0.0015	0.388435	568.267	7.9	1462.96		39.1181	5.1388	23.0106	7.6123	6.12	0.330817		9.9555	0.4193	16.9857	23.7431	2.11	1.39783		2.1435	0.0684	2.33836	31.3377	3.3	13.4016		127.474	18.346	23.2948	6.94833	19.7	0.298279
0.8182	0.0014	0.372851	584.429	7.9	1567.46		21.7624	0.8473	30.6034	26.7047	2.56	0.839267		8.1418	0.1897	13.8912	42.9193	2.11	3.08967		2.0491	0.0687	2.23538	29.8268	3.3	13.343		80.8656	10.9275	14.7775	7.40019	19.7	0.500775
1.6124	0.0041	0.734765	393.268	7.9	535.23		4.9238	1.1058	0.899781	4.4527	19.7	4.94865		7.2303	0.1813	12.3361	39.8803	2.11	3.23282		1.5911	0.0447	1.73575	35.5951	3.3	20.5071		64.3003	8.5847	11.7503	7.4901	19.7	0.637439
2.0923	0.0047	0.953453	445.17	7.9	466.903		0.0093	0.0033	0.0101455	2.81818	3.3	277.778		6.1858	0.1362	10.554	45.417	2.11	4.30331		1.1689	0.0305	1.27516	38.3246	3.3	30.0546		66.4311	7.8034	12.1397	8.5131	19.7	0.701261
2.6753	0.0093	1.21912	287.667	7.9	235.962		21.3044	2.0348	3.89319	10.47	19.7	2.68932
1.4239	0.0035	0.826781	406.829	6.2	492.063		1.4138	0.0126	1.54233	112.206	3.3	72.7513
1.1108	0.0029	0.644981	383.034	6.2	593.87		13.7563	2.1211	2.51384	6.48546	19.7	2.5799
0.9899	0.002	0.574781	494.95	6.2	861.111		0.7522	0.0146	0.820582	51.5205	3.3	62.7854
2.0524	0.0063	1.19172	325.778	6.2	273.369		7.4671	1.1847	1.36455	6.30295	19.7	4.61908
2.0819	0.0063	1.20885	330.46	6.2	273.369		0.2234	0.0138	0.243709	16.1884	3.3	66.4251
2.3762	0.0082	1.37973	289.78	6.2	210.027		3.0031	0.0707	0.905457	42.8352	11.94	46.9118
4.5411	0.0413	0.888476	109.954	18.4	123.756		5.6155	0.1038	1.68465	54.0992	12	32.113
4.1006	0.0411	0.802291	99.7713	18.4	124.358		6.6896	0.1135	2.00688	58.9392	12	29.3686
4.0752	0.0362	0.797322	112.575	18.4	141.191		5.048	0.0927	1.5144	54.4552	12	35.9583
5.2305	0.0504	1.02336	103.78	18.4	101.411		3.2706	0.0705	0.98118	46.3915	12	47.2813
6.4517	0.0729	1.26229	88.5007	18.4	70.1113		0.7858	0.0195	0.23574	40.2974	12	170.94
							1.4736	0.0388	0.947314	37.9794	5.6	40.0916
							0.7527	0.0219	0.483879	34.3699	5.6	71.0299
							2.9299	0.1139	0.945977	25.9086	11.15	27.1925
							3.8722	0.1221	3.34291	31.7133	4.17	9.48676
							3.4502	0.1089	3.65315	31.6823	3.4	8.67258
							5.2804	0.2011	3.78674	26.5959	5.02	6.93408
							8.4493	0.32	2.17268	26.4041	14	12.1528
							12.2847	0.6144	8.04089	19.9946	5.5	2.48662
							13.0157	0.6846	8.51937	19.0121	5.5	2.23164
							12.3715	0.6815	8.09771	18.1533	5.5	2.24179
							14.4277	0.8281	9.44359	17.4227	5.5	1.84492
							0.8806	0.0588	2.05855	14.9762	1.54	7.27513
							9.0947	0.3915	4.8867	23.2304	6.7	4.7538
							2.8223	0.0313	0.826039	90.9097	12.3	109.159
							3.4341	0.1492	0.374629	23.0168	33	61.4388
							13.0209	0.6017	4.68752	21.6402	10	4.61655
							10.956	0.6077	3.94416	18.0286	10	4.57097
							3.3349	0.2075	1.20056	16.0718	10	13.3869
							13.4936	0.2337	1.58748	60.5171	30.6	36.3714
							8.4384	0.6587	1.8752	12.8107	16.2	6.83164
